# Supplementary material for: AlphaFold2 Reveals Structural Patterns of Seasonal Haplotype Diversification in SARS-CoV-2 Nucleocapsid Protein Variants
Source: Preprints.org preprint supplement (doi:10.20944/preprints202407.0591.v1), 2024-07-08
Supplement: Supplementary file 3 [file supplementary]

**Table S1.** Emergence of VOCs and haplotypes and their mutant constellations. Time of origin is given in a scale of relative appearance. Data from ref. [14].

| Haplotype/VOC  | Mutations                                   | Time of Origin |
|----------------|---------------------------------------------|----------------|
| <b>Omicron</b> | P13L, E31-, R32-, S33-, R203K, G204R, S413R | 10             |
| <b>H16</b>     | S413R                                       | 9              |
| <b>H18</b>     | E31-, R32-, S33-                            | 8              |
| <b>H15</b>     | P13L                                        | 7              |
| <b>Delta</b>   | D63G, R203M, G215C, D377Y                   | 6              |
| <b>H6</b>      | G215C                                       | 5              |
| <b>H7</b>      | D63G, R203M, D377Y                          | 4              |
| <b>Alpha</b>   | D3L, R203K, G204R, S235F                    | 3              |
| <b>H1</b>      | D3L, S235F                                  | 2              |
| <b>H2</b>      | R203K, G204R                                | 1              |
| <b>Wuhan</b>   | —                                           | 0              |
